# Supplementary material
Source: PubMed Central journal article supplement (PMC3156202)
Supplement: 1107050108_pnas.1107050108_SI.pdf [file 1107050108_pnas.1107050108_SI.pdf]

# Supporting Information

Otaka et al. 10.1073/pnas.1107050108

## SI Materials and Methods.

**Media and Growth Conditions.** Cells were grown aerobically at 37°C in LB medium supplemented with indicated compounds. Antibiotics were used at the following concentrations when needed: kanamycin (15 µg/mL) and ampicillin (50 µg/mL). Bacterial growth was monitored by determining the optical density at 600 nm.

**Construction of Plasmids.** Chromosomal or plasmid DNAs were used as templates for PCR. A DNA fragment containing the *araC-araBAD* promoter region up to +1 relative to the transcription start site was amplified, digested with *EcoRI* and *SalI*, and cloned into the low copy number plasmid pMW218 to obtain pAraS. Similarly, a DNA fragment containing the *araC-araBAD* promoter region was amplified, digested with *EcoRI* and *XbaI*, and cloned into pMW218 to obtain pAraX. Plasmids pAraS and pAraX were used as vectors to construct a series of plasmids expressing sRNAs and their variants. A DNA fragment containing the full-length *sgrS* was amplified, digested with *SalI* and *HindIII*, and cloned into pAraS to obtain pSgrS. A DNA fragment containing the truncated *sgrS-S* was amplified, digested with *XbaI* and *HindIII*, and cloned into pAraX to obtain pSgrS-S. DNA fragments containing the genes for a series of SgrS variants were amplified, digested with *SalI* and *HindIII*, and cloned into pAraS to obtain the corresponding plasmids. DNA fragments containing the genes for other sRNAs and their variants were amplified,

digested with *XbaI* and *HindIII*, and cloned into pAraX to obtain the corresponding plasmids. In all cases, the region from the transcription start to a few bases downstream from the last T of the terminator polyT was amplified. Plasmids pRyhB and pRyhB-4U were digested with *EcoRI* and *HindIII*. The resulting fragments were cloned into the high copy number plasmid pTWV228 to obtain pT-RyhB and pT-RyhB-4U, respectively. The nucleotide sequences of all constructs were verified by DNA sequencing.

**DNA Probes for Northern Blotting.** The following digoxigenin (DIG)-labeled DNA probes were prepared by PCR using DIG-dUTP: 305-bp fragment corresponding to the 5' region of *ptsG* (*ptsG* probe); 150-bp fragment containing the 5' portion (+1 to +150) of *SgrS* (*SgrS* probe 1); 60-bp fragment containing the 3' portion (+168 to +227) of *SgrS* (*SgrS* probe 2); 210-bp fragment corresponding to the 5' region of *sodB* (*sodB* probe); 87-bp fragment corresponding to the *ryhB* (*RyhB* probe); 235-bp fragment corresponding to the 5' region of *ompA* (*ompA* probe); 220-bp fragment corresponding to the 5' region of *ompF* (*ompF* probe); 85-bp fragment corresponding to the *micF* (*MicF* probe). A 5' end DIG-labeled synthetic DNA oligonucleotide corresponding to antisense sequence of the 1–50 nt of *MicA* (Rikaken Co. Ltd.) was used as the *MicA* probe. RA Low II Easy Load (BioDynamics Laboratory Inc.) was used as RNA marker when indicated.

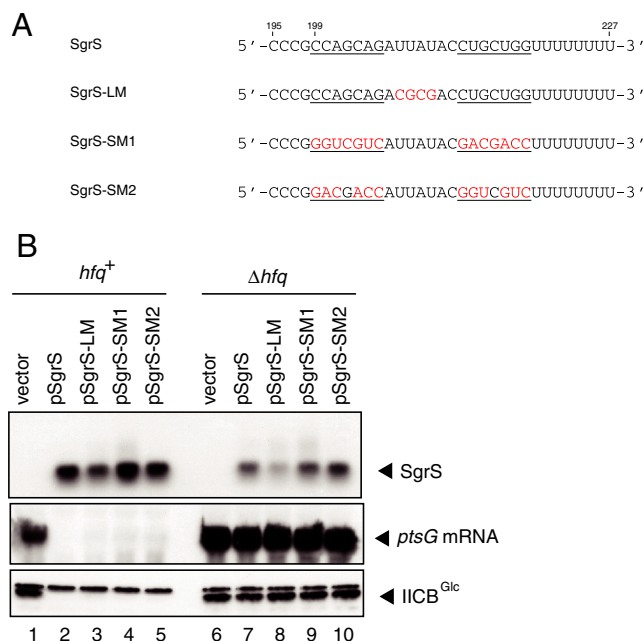

**Fig. S1.** Effects of mutations in the terminator hairpin on SgrS function. (A) Nucleotide sequences around the terminator of SgrS variants. Nucleotides changed from the wild-type SgrS sequence are shown in red. The inverted repeat sequences are underlined. (B) Effects of mutations on the expression and function of SgrS. IT1568 and TM589 cells harboring indicated plasmids were grown in LB medium. At  $A_{600} = 0.6$ , total RNAs were prepared, and 0.25 or 7 µg of each RNA sample was subjected to Northern blot analysis using the SgrS probe 1 or the *ptsG* probe. Total proteins were also prepared and samples equivalent to 0.025  $A_{600}$  units were subjected to Western blot analysis using anti-IIB antibodies.

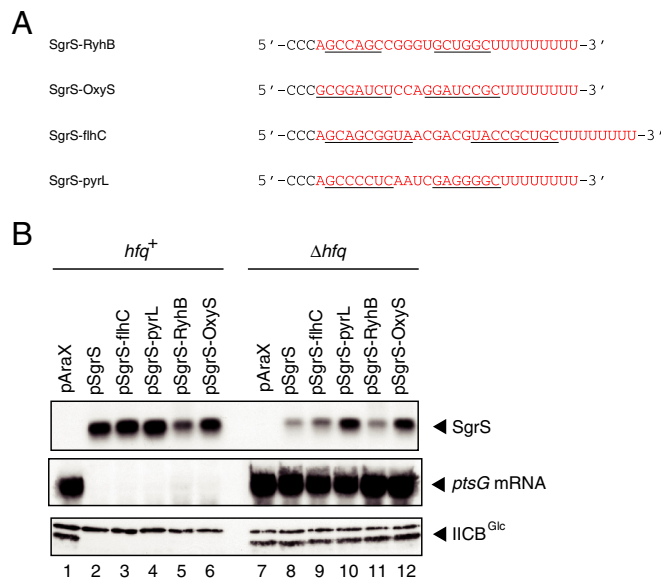

**Fig. S2.** Effects of foreign terminators on SgrS function. (A) Nucleotide sequences around the terminator of SgrS variants. Nucleotides corresponding to foreign terminators are shown in red. The inverted repeat sequences are underlined. (B) Expression of chimeric SgrS variants and their effect on *ptsG* expression. IT1568 and TM589 cells harboring indicated plasmids were grown in LB medium. At  $A_{600} = 0.6$ , total RNAs were prepared and 0.25 or 7  $\mu\text{g}$  of each RNA sample was subjected to Northern blot analysis using the SgrS probe 1 or the *ptsG* probe. Total proteins were also prepared and samples equivalent to 0.025  $A_{600}$  units were subjected to Western blot analysis using anti-IIB antibodies.

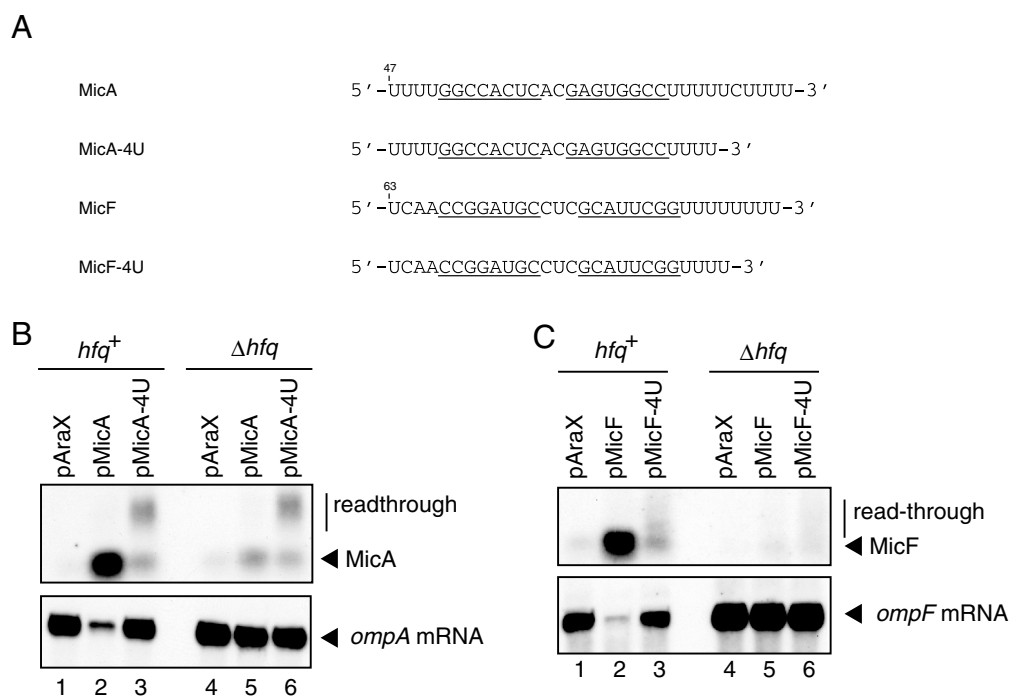

**Fig. S3.** Effects of polyU tail shortening on the expression and function of MicA and MicF. (A) Nucleotide sequences around the terminator. The inverted repeat sequences are underlined. (B) Expression and function of MicA and MicA-4U. IT1568 and TM589 cells harboring indicated plasmids were grown in LB medium. At  $A_{600} = 0.6$ , total RNAs were prepared and 1  $\mu\text{g}$  of each RNA sample was subjected to Northern blot analysis using the MicA and *ompA* probes. (C) Expression and function of MicF and MicF-4U. IT1568 and TM589 cells harboring indicated plasmids were grown in LB medium. At  $A_{600} = 0.6$ , total RNAs were prepared and 1  $\mu\text{g}$  of each RNA sample was subjected to Northern blot analysis using the MicF and *ompF* probes.

**Table S1. Nucleotide sequences around the rho-independent terminators of sRNA genes used in this study**

|                    |                                                   |
|--------------------|---------------------------------------------------|
| <i>sgrS/sgrS-5</i> | 5'-CCCGCCAGCAGATTATACCTGCTGGTTTTTTTTAT-3'         |
| <i>sgrS-LM</i>     | 5'-CCCGCCAGCAGACGCGACCTGCTGGTTTTTTTTAT-3'         |
| <i>sgrS-SM1</i>    | 5'-CCCGGGTCGTCATTATACGACGACCTTTTTTTTTAT-3'        |
| <i>sgrS-SM2</i>    | 5'-CCCGGACGACCATTATACGGTCGCTTTTTTTTTAT-3'         |
| <i>sgrS-7T</i>     | 5'-CCCGCCAGCAGATTATACCTGCTGGTTTTTTTTAT-3'         |
| <i>sgrS-6T</i>     | 5'-CCCGCCAGCAGATTATACCTGCTGGTTTTTTTTAT-3'         |
| <i>sgrS-5T</i>     | 5'-CCCGCCAGCAGATTATACCTGCTGGTTTTTTTTAT-3'         |
| <i>sgrS-4T</i>     | 5'-CCCGCCAGCAGATTATACCTGCTGGTTTTTTTTAT-3'         |
| <i>sgrS-LS8T</i>   | 5'-CCCGCCAGCAGCCCCATTATACGGGGCTGCTGGTTTTTTTTAT-3' |
| <i>sgrS-LS4T</i>   | 5'-CCCGCCAGCAGCCCCATTATACGGGGCTGCTGGTTTTTTTTAT-3' |
| <i>sgrS-ryhB</i>   | 5'-CCCAGCCAGCCGGGTGCTGGCTTTTTTTTTGA-3'            |
| <i>sgrS-oxyS</i>   | 5'-CCCGCGGATCTCCAGGATCCGCTTTTTTTTTGC-3'           |
| <i>sgrS-flhC</i>   | 5'-CCCAGCAGCGGTAAACGACGTACCGCTGCTTTTTTTTTGC-3'    |
| <i>sgrS-pyrL</i>   | 5'-CCCAGCCCCTCAATCGAGGGGCTTTTTTTTTGC-3'           |
| <i>ryhB</i>        | 5'-CTTAGCCAGCCGGGTGCTGGCTTTTTTTTTGA-3'            |
| <i>ryhB-4T</i>     | 5'-CTTAGCCAGCCGGGTGCTGGCTTTTTTTGA-3'              |
| <i>micA</i>        | 5'-TTTTGGCCACTCACGAGTGGCCTTTTCAGG-3'              |
| <i>micA-4T</i>     | 5'-TTTTGGCCACTCACGAGTGGCCTTTTCAGG-3'              |
| <i>micF</i>        | 5'-TCAACCGGATGCCTCGATTGCTTTTTTTACCC-3'            |
| <i>micF-4T</i>     | 5'-TCAACCGGATGCCTCGATTGCTTTTTTTACCC-3'            |

**Table S2. PolyT tails of rho-independent terminators of *Escherichia coli* Hfq-binding sRNAs**

| Name of sRNA gene   | Sequence of polyT tail of rho-independent terminator |
|---------------------|------------------------------------------------------|
| <i>ryhB</i>         | TTTTTTTT (9T)                                        |
| <i>micC</i>         | TTTTTTTT (9T)                                        |
| <i>sgrS</i>         | TTTTTTTTATT (8TA2T)                                  |
| <i>rseX</i>         | TTTTTTTTAT (8TAT)                                    |
| <i>oxyS</i>         | TTTTTTTT (8T)                                        |
| <i>omrA</i>         | TTTTTTTT (8T)                                        |
| <i>omrB</i>         | TTTTTTTT (8T)                                        |
| <i>micF</i>         | TTTTTTTT (8T)                                        |
| <i>gcvB</i>         | TTTTTTTT (8T)                                        |
| <i>rprA</i>         | TTTTTTTT (8T)                                        |
| <i>mgrR</i>         | TTTTTTTT (8T)                                        |
| <i>dsrA</i>         | TTTTTTTTATT (7TA2T)                                  |
| <i>glmZ</i>         | TTTTTTTTAT (7TAT)                                    |
| <i>chiX (micM)</i>  | TTTTTTTT (7T)                                        |
| <i>spf (SpoT42)</i> | TTTTTTATT (6TA2T)                                    |
| <i>rybB</i>         | TTTTTTGTT (6TG2T)                                    |
| <i>arcZ</i>         | TTTTTT (6T)                                          |
| <i>micA</i>         | TTTTTCTTTT (5TC4T)                                   |
| <i>rydC</i>         | TTTTCTTT (4TC3T)                                     |
| <i>cyaR</i>         | TTATTTTTT (2TA6T)                                    |

The sequences were taken from Kyoto Encyclopedia of Genes and Genomes (KEGG) database (<http://www.genome.jp/kegg/>).

**Table S3. Bacterial strains and plasmids used in this study**

| Strain/plasmid | Relevant genotype and property                                     | Source/reference  |
|----------------|--------------------------------------------------------------------|-------------------|
| Strain         |                                                                    |                   |
| IT1568         | W3110 <i>mIc</i>                                                   | laboratory stock  |
| TM589          | W3110 <i>mIc</i> $\Delta$ <i>hfq</i>                               | Morita et al. (1) |
| TM542          | W3110 <i>mIc</i> $\Delta$ ( <i>sgrR-sgrS</i> )                     | Kawamoto et al. 2 |
| TM615          | W3110 <i>mIc</i> <i>hfq-FLAG-cat</i>                               | Morita et al. 1   |
| TM771          | W3110 <i>mIc</i> $\Delta$ ( <i>sgrR-sgrS</i> ) <i>hfq-FLAG-cat</i> | this study        |
| Plasmid        |                                                                    |                   |
| pMW218         | Low copy number plasmid vector                                     | NIPPON GENE       |
| pAraS          | Derivative of pMW218 carrying the <i>araC-PBAD</i>                 | this study        |
| pAraX          | Derivative of pMW218 carrying the <i>araC-PBAD</i>                 | this study        |
| pSgrS          | Derivative of pAraS carrying the <i>sgrS</i>                       | this study        |
| pSgrS-5        | Derivative of pAraX carrying the <i>sgrS-5</i>                     | this study        |
| pSgrS-LM       | Derivative of pAraS carrying the <i>sgrS-LM</i>                    | this study        |
| pSgrS-SM1      | Derivative of pAraS carrying the <i>sgrS-SM1</i>                   | this study        |
| pSgrS-SM2      | Derivative of pAraS carrying the <i>sgrS-SM2</i>                   | this study        |
| pSgrS-7U       | Derivative of pAraS carrying the <i>sgrS-7T</i>                    | this study        |
| pSgrS-6U       | Derivative of pAraS carrying the <i>sgrS-6T</i>                    | this study        |
| pSgrS-5U       | Derivative of pAraS carrying the <i>sgrS-5T</i>                    | this study        |
| pSgrS-4U       | Derivative of pAraS carrying the <i>sgrS-4T</i>                    | this study        |
| pSgrS-LS8U     | Derivative of pAraS carrying the <i>sgrS-LS8T</i>                  | this study        |
| pSgrS-LS4U     | Derivative of pAraS carrying the <i>sgrS-LS4T</i>                  | this study        |
| pSgrS-RyhB     | Derivative of pAraS carrying the <i>sgrS-ryhB</i>                  | this study        |
| pSgrS-OxyS     | Derivative of pAraS carrying the <i>sgrS-oxyS</i>                  | this study        |
| pSgrS-flhC     | Derivative of pAraS carrying the <i>sgrS-flhC</i>                  | this study        |
| pSgrS-pyrL     | Derivative of pAraS carrying the <i>sgrS-pyrL</i>                  | this study        |
| pRyhB          | Derivative of pAraX carrying the <i>ryhB</i>                       | this study        |
| pRyhB-4U       | Derivative of pAraX carrying the <i>ryhB-4T</i>                    | this study        |
| pMicA          | Derivative of pAraX carrying the <i>micA</i>                       | this study        |
| pMicA-4U       | Derivative of pAraX carrying the <i>micA-4T</i>                    | this study        |
| pMicF          | Derivative of pAraX carrying the <i>micF</i>                       | this study        |
| pMicF-4U       | Derivative of pAraX carrying the <i>micF-4T</i>                    | this study        |
| pTWV228        | High copy number plasmid vector                                    | TAKARA            |
| pT-RyhB        | Derivative of pTWV228 carrying the <i>araC-PBAD-ryhB</i>           | this study        |
| pT-RyhB-4U     | Derivative of pTWV228 carrying the <i>araC-PBAD-ryhB-4T</i>        | this study        |

1. Morita T, Maki K, Aiba H (2005) RNase E-based ribonucleoprotein complexes: Mechanical basis of mRNA destabilization mediated by bacterial noncoding RNAs. *Genes Dev* 19:2176–2186.
2. Kawamoto H, et al. (2005) Implication of membrane localization of target mRNA in the action of a small RNA: Mechanism of post-transcriptional regulation of glucose transporter in *Escherichia coli*. *Genes Dev* 19:328–338.

Table S4. DNA primers used for construction of plasmids

| Primer | Sequence                                                                | Plasmid                                             |
|--------|-------------------------------------------------------------------------|-----------------------------------------------------|
| 926    | CCCCGAATTCCTGATTGTTACCAA                                                | pAraS, pAraX (F)                                    |
| 927    | CCCCGTCGACGGTATGGAGAAACAGTAG                                            | pAraS (R)                                           |
| 975    | CGCGCTAGAAAACAGTAGAGAGTT                                                | pAraX (R)                                           |
| 928    | CCCCGTCGACGATGAAGCAAGGGGG                                               | pSgrS, pSgrS-LM, -SM1,<br>-SM2, -4U, -5U, -6U, -7U, |
|        | -LS8U, -LS4U, -RyhB, -OxyS, -flhC, -pyrL (F)                            |                                                     |
| 930    | CCCAAGCTTATAAAAAAACCAGCAGG                                              | pSgrS (R)                                           |
| 1,127  | GCGCTCTAGATAGTGTGACTGAGTATTGGT                                          | pSgrS-S (F)                                         |
| 929    | CCCAAGCTTGATAGCCATCAAACAGC                                              | pSgrS-S ((R)                                        |
| 1,236  | CCCAAGCTTATAAAAAAACCAGCAGGTGCGTCTGCTGGCGGGTGATTTTACAC                   | pSgrS-LM (R)                                        |
| HO14   | CCCAAGCTTATAAAAAAAGGTCGTCGTATAATGACGACCCGGGTGATTTTACAC                  | pSgrS-SM1 (R)                                       |
| HO15   | CCCAAGCTTATAAAAAAAGACGACCGTATAATGGTCGTCGGGTGATTTTACAC                   | pSgrS-SM2 (R)                                       |
| HO17   | CCCAAGCTTATAAAAAACCAGCAGGTATAATCTGCT                                    | pSgrS-4U (R)                                        |
| HO18   | CCCAAGCTTATAAAAAACCAGCAGGTATAATCTGCT                                    | pSgrS-5U (R)                                        |
| HO19   | CCCAAGCTTATAAAAAACCAGCAGGTATAATCTGCT                                    | pSgrS-6U (R)                                        |
| HO20   | CCCAAGCTTATAAAAAACCAGCAGGTATAATCTGCT                                    | pSgrS-7U (R)                                        |
| 1,118  | CCCAAGCTTATAAAAAAACCAGCAGCCCCGTATAATGGGGCTGCTGGCGGGTGATTTTAC            | pSgrS-LS8U (R)                                      |
| 1,120  | CCCAAGCTTATAAAACCAGCAGCCCCGTATAATGGGGCTGCTGGCGGGTGATTTTAC               | pSgrS-LS4U (R)                                      |
| 1,176  | CCCAAGCTTACGAAAGATCAAAAAAAGCCAGCACCCGGCTGGCTGGGTGATTTTACACCAATAC        | pSgrS-RyhB (R)                                      |
| 1,177  | CCCAAGCTTTTTTATGGCAAAAAAAGCGGATCCTGGAGATCCGCGGGTGATTTTACACCAATAC        | pSgrS-OxyS (R)                                      |
| 1,172  | CCCAAGCTTCGATTGGGGCAAAAAAAGCAGCGGTACGTCGTTACCGCTGCTGGGTGATTTTACACCAATAC | pSgrS-flhC (R)                                      |
| 1,171  | CCCAAGCTTACGCCTGGGCAAAAAAAGCCCTCGATTGAGGGGCTGGGTGATTTTACACCAATAC        | pSgrS-pyrL (R)                                      |
| 1,144  | GCGCTCTAGATAGCGATCAGGAAGACCCCTC                                         | pRyhB, pRyhB-4U (F)                                 |
| 1,145  | CCCAAGCTTTGAGAACGAAAGATCAAAAA                                           | pRyhB (R)                                           |
| 1,152  | CCCAAGCTTTGAGAACGAAAGATCAAAAAGCCAGCACCCGGCTGG                           | pRyhB-4U (R)                                        |
| 1,148  | GCGCTCTAGATAGAAAGACGCGCATTTGTT                                          | pMicA, pMicA-4U (F)                                 |
| 1,149  | CCCAAGCTTTGGAAAAACACGCCTGACAG                                           | pMicA (R)                                           |
| 1,154  | CCCAAGCTTTGGAAAAACACGCCTGAAAAGGCCACTCGTGAGTGG                           | pMicA-4U (R)                                        |
| 1,150  | GCGCTCTAGATAGCTATCATTAACCTTT                                            | pMicF, pMicF-4U (F)                                 |
| 1,151  | CCCAAGCTTAAAAGTGTGTAAGAAGGGT                                            | pMicF (R)                                           |
| 1,155  | CCCAAGCTTAAAAGTGTGTAAGAAGGGTAAAACCGAATGCGAGGCATC                        | pMicF-4U (R)                                        |
